# Supplementary material
Source: Springer Nature journal article supplement (https://www.springermedizin.de/resource/supplementary/12891_2012_1678_MOESM1_ESM.pdf/9509132)
Supplement: MOESM1 [file 9509132]

## Enrollment

Assessed for eligibility (n=1600)

### Excluded (n=830)

- ◆ Not meeting inclusion criteria
- ◆ Declined to participate
- ◆ Other reasons

Randomized (n=770)

## Allocation

### Coordinated multidisciplinary intervention

#### Step 1 (week 1-4)

Allocated to intervention (n=385)

- Interview by RTW coordinator
- Examination and treatment by physiotherapist, chiropractor and/or rheumatologist (n=370)
- Counselling by social worker (n=140)
- Interview and CBT by psychologist (n=35)
- Examination by occupational physician (n=50)
- Workplace visit (n=25)
- Social worker at municipal sickness benefit office (n=70)
- Involvement of employer (n=15)

#### Completed treatment (n=230)

Received allocated intervention (n=370)

- ◆ Did not receive allocated intervention (n=15)

### Coordinated multidisciplinary intervention

#### Step 2 (week 5-12)

- Continued treatment by physiotherapist, chiropractor and/or rheumatologist (n=95)
- Counselling by social worker (n=50)
- Interview and CBT by psychologist (n=20)
- Examination by occupational physician (n=20)
- Social worker at municipal sickness benefit office (n=25)
- Involvement of employer (n=10)
- Roundtable conference/discussion (n=140)

#### Completed treatment (n=110)

### Coordinated multidisciplinary intervention

#### Step 3 (week 13)

Status send to municipal sickness benefit office (n=30)

### Usual care

Allocated to intervention (n=385)

- Examination and treatment by physiotherapist, chiropractor and/or rheumatologist (n=370)
- Counselling by social worker (n=150)

◆ Received allocated intervention (n=370)

◆ Did not receive allocated intervention (n=15)

Follow-up at the end of treatment, 6 and 12 months
